# Supplementary material
Source: PubMed Central journal article supplement (PMC6465117)
Supplement: NIHMS1002737-supplement-Figures_S1-S5.pdf [file NIHMS1002737-supplement-Figures_S1-S5.pdf]

# Supporting Information

## Data-independent acquisition mass spectrometry to quantify protein levels in FFPE tumor biopsies for molecular diagnostics

Yeoun Jin Kim\*, <sup>1</sup>, Steve MM Sweet<sup>1</sup>, Jarrett D Egertson<sup>3</sup>, Andrew J Sedgewick<sup>2</sup>, Sunghee Woo<sup>1</sup>, Wei-li Liao<sup>1</sup>, Gennifer E Merrihew<sup>3</sup>, Brian C Searle<sup>3</sup>, Charlie Vaske<sup>2</sup>, Robert Heaton<sup>1</sup>, Michael J MacCoss<sup>3</sup>, Todd Hembrough<sup>1</sup>

<sup>1</sup>NantOmics, 9600 Medical Center Dr, Rockville, MD 20850, <sup>2</sup>NantOmics, 2919 Mission St, Santa Cruz, CA 95060, <sup>3</sup>University of Washington, Department of Genome Sciences, 3720 15th Avenue NE, Seattle, WA 98195.

Supporting Fig S-1. An example of tissue images before and after microdissection (sample #8 was used in this figure). A. Hematoxylin and eosin (H&E) stained tissue section. B. Hemtoxylin stained tissue section after markup based on the H&E image and before microdissection. C. Hemtoxylin stained tissue section after microdissection.

Supporting Fig S-2. Standard curve showing linear response for EGFR peptide, IPLENLQIIR. A 14 point curve was generated by spiking 50 to 25,000 amol into a *Pyrococcus furiosus* background, with seven replicates at each point. Error bars show standard deviation.

Supporting Fig S-3. Standard curve showing linear response for TUBB3 peptide, ISVYYNEASSHK. An 8 point curve was generated by spiking 250 to 25,000 amol into a *Pyrococcus furiosus* background, with six replicates at each point. Error bars show standard deviation.

Supporting Fig S-4. Hierarchical clustering of 3,713 protein groups and 12 samples. Clustering carried out in Perseus v1.6.0.7. (Euclidean distance; average linkage; pre-process with k-means (300 clusters; maximum 10 iterations; 1 restart).

Supporting Fig S-5. Histogram of mRNA-protein correlations for each of 3,429 genes across twelve patients.

Supporting Table S-1. List of tumor biopsy samples.

Supporting Table S-2. SRM transitions

Supporting Table S-3. Comprehensive DIA results of 12 samples.

Supporting Table S-4. List of proteins identified from library (4,239).

Supporting Table S-5. List of non-redundant protein groups (3,713)

Supporting Table S-6. List of proteins differentially expressed.

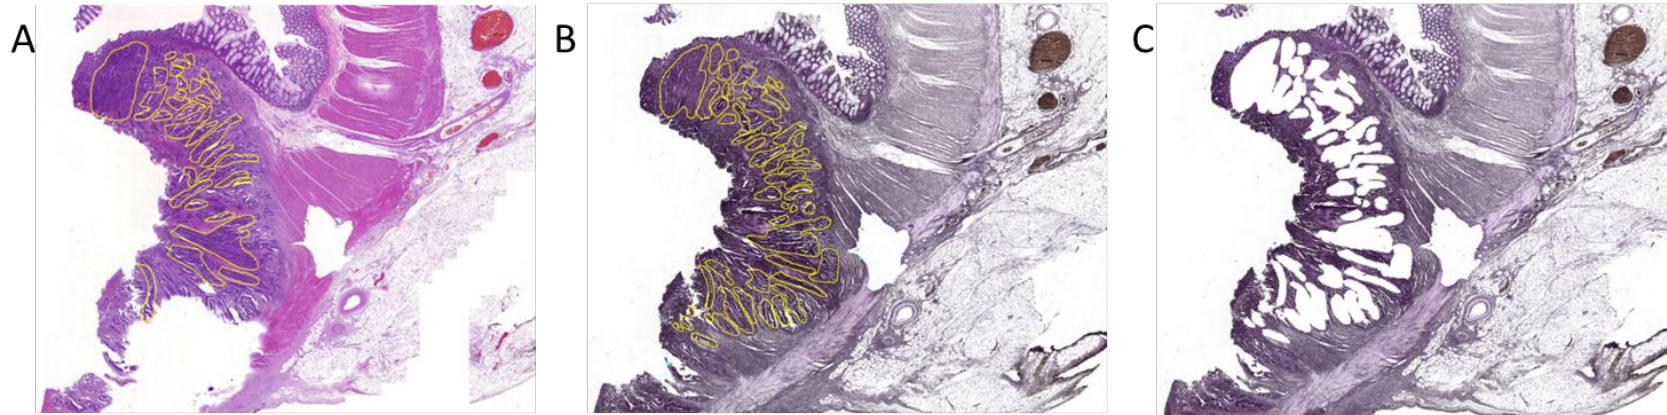

Fig S-1. An example of tissue images before and after microdissection (sample #8 was used in this figure). A. Hematoxylin and eosin (H&E) stained tissue section. B. Hemtoxylin stained tissue section after markup based on the H&E image and before microdissection. C. Hemtoxylin stained tissue section after microdissection.

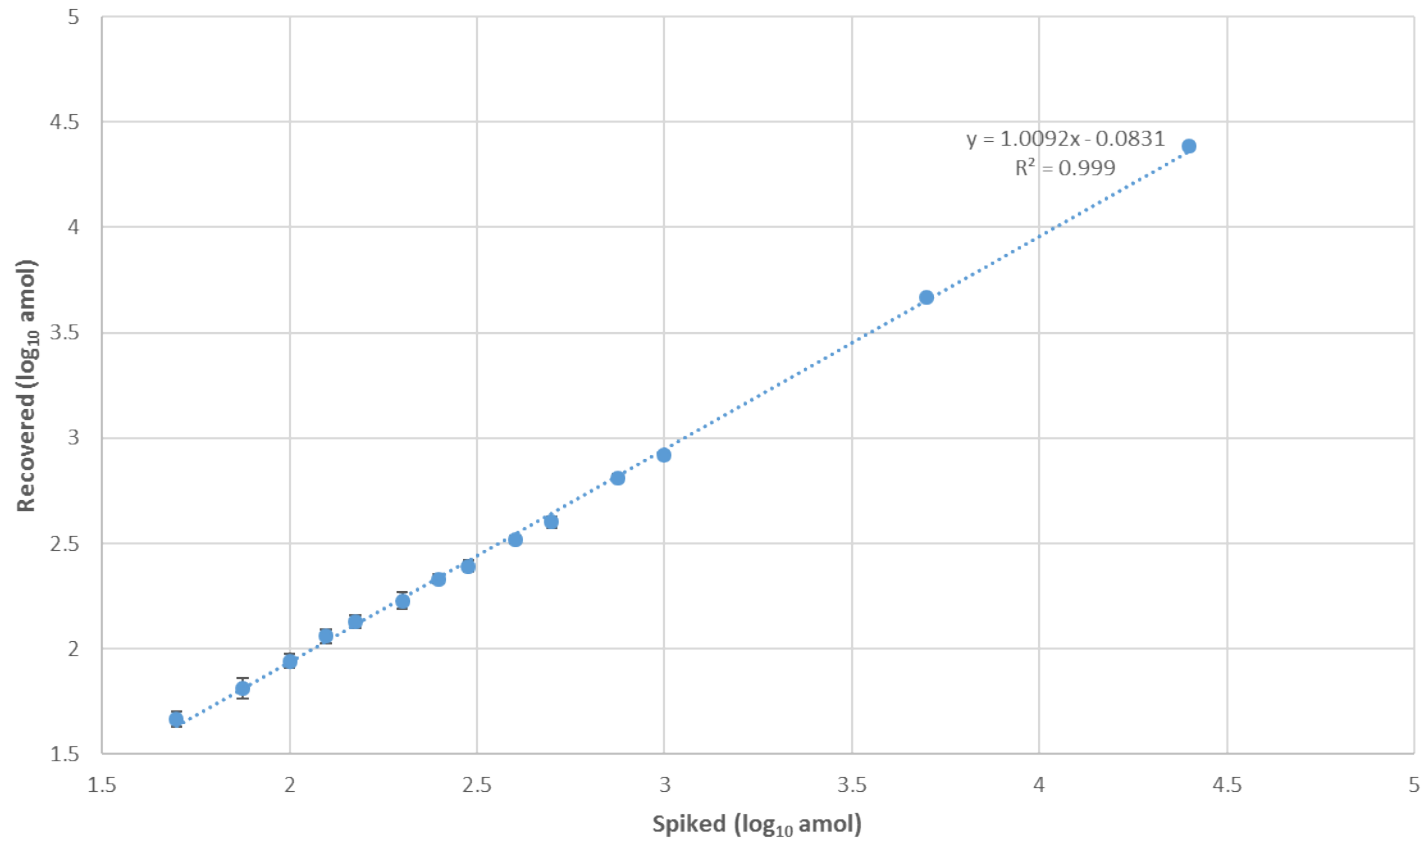

**Fig S-2.** Standard curve showing linear response for EGFR peptide, IPLENLQIIR. A 14 point curve was generated by spiking 50 to 25,000 amol into a *Pyrococcus furiosus* background, with seven replicates at each point. Error bars show standard deviation.

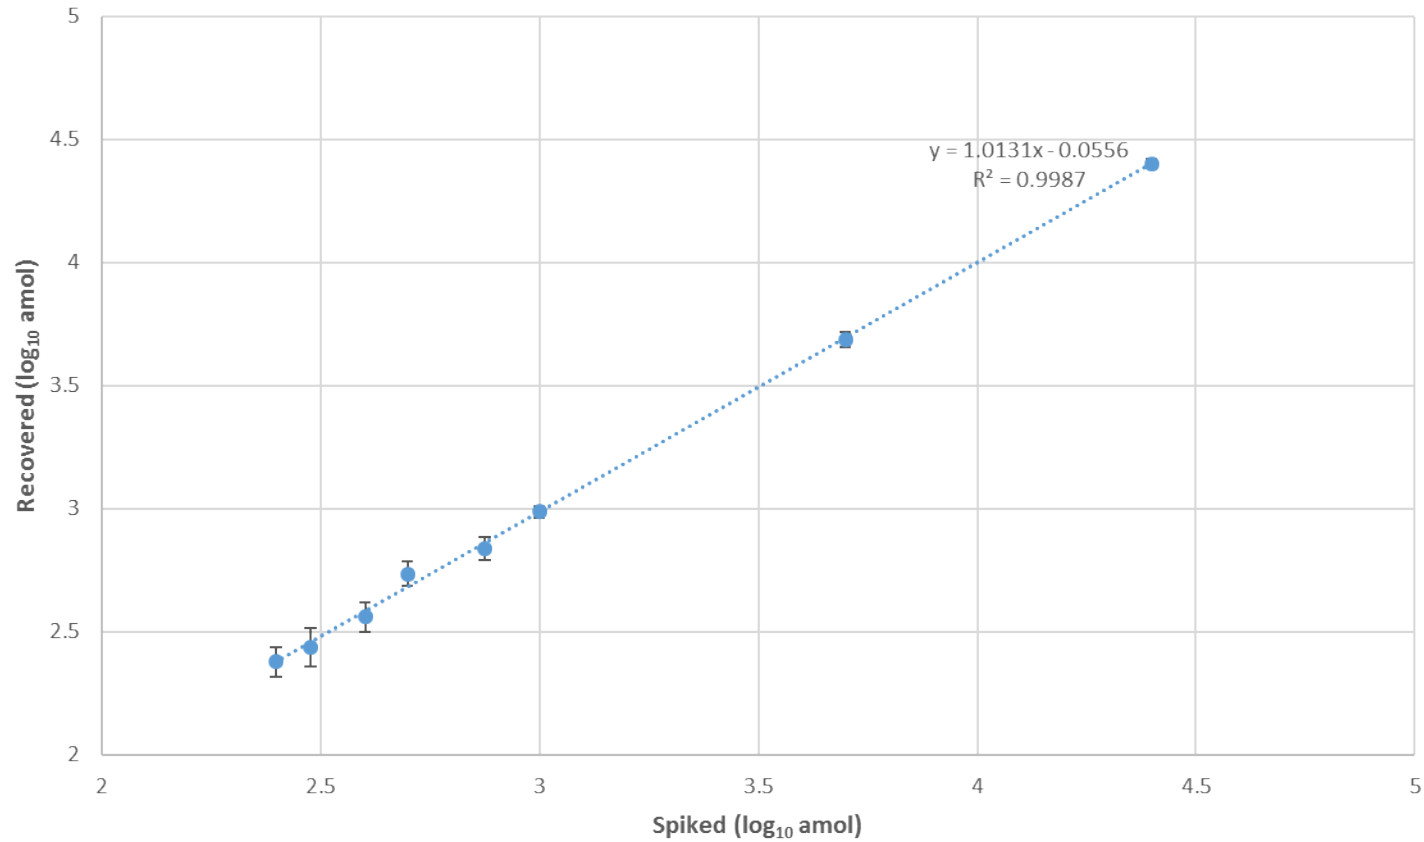

**Fig S-3.** Standard curve showing linear response for TUBB3 peptide, ISVYYNEASSHK. An 8 point curve was generated by spiking 250 to 25,000 amol into a *Pyrococcus furiosus* background, with six replicates at each point. Error bars show standard deviation.

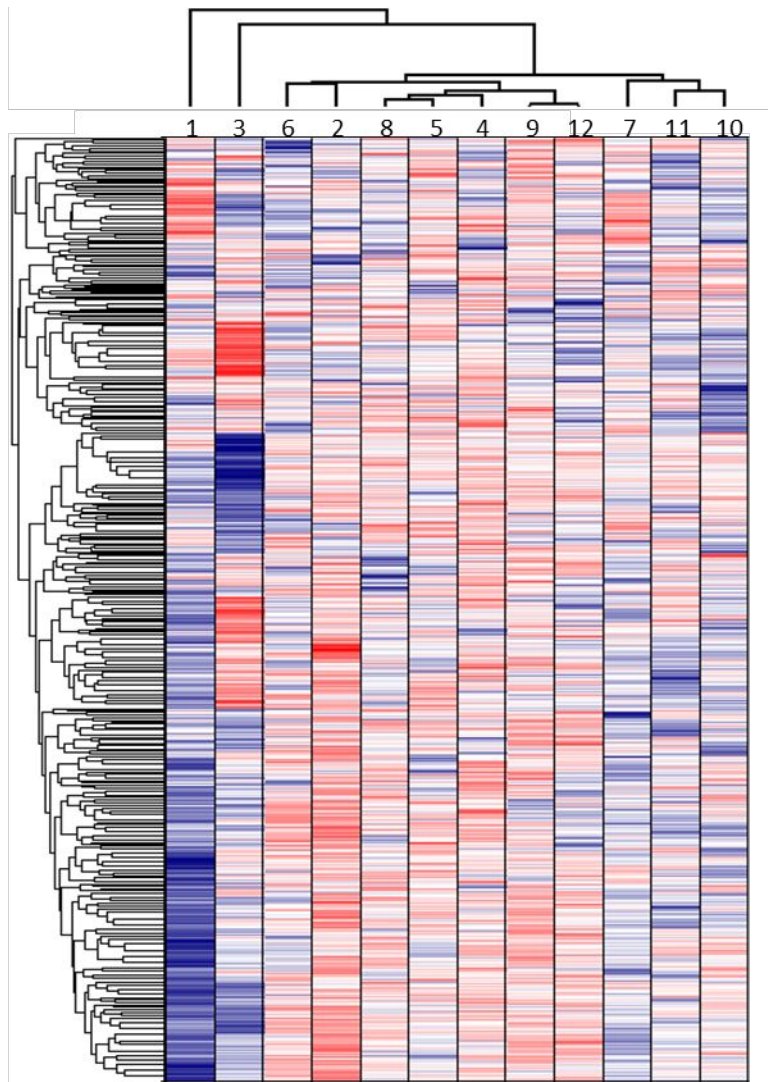

**Fig S-4.** Hierarchical clustering of 3,713 protein groups and 12 samples. Clustering carried out in Perseus v1.6.0.7. (Euclidean distance; average linkage; pre-process with k-means (300 clusters; maximum 10 iterations; 1 restart).

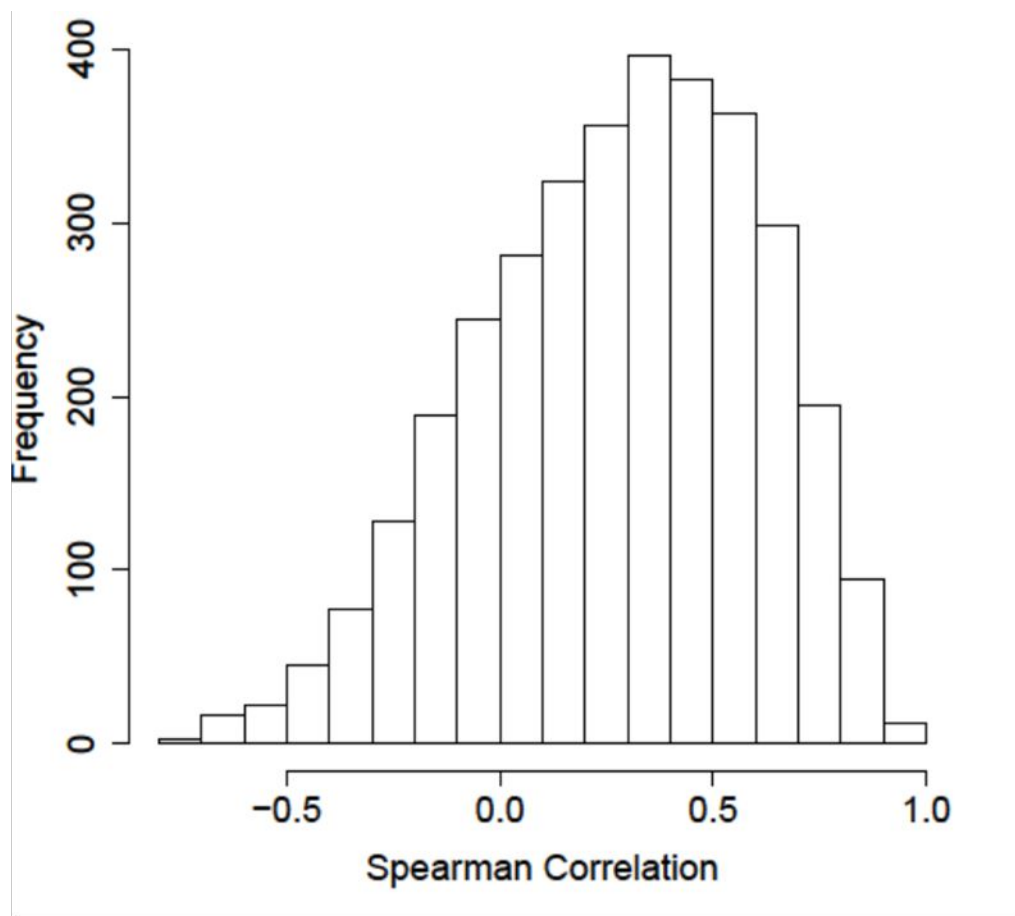

**Fig S-5.** Histogram of mRNA-protein correlations for each of 3,429 genes across twelve patients.
